# Supplementary material
Source: Springer Nature journal article supplement (https://www.springerprofessional.de/resource/supplementary/40493_2013_4_MOESM1_ESM.pdf/11899612)

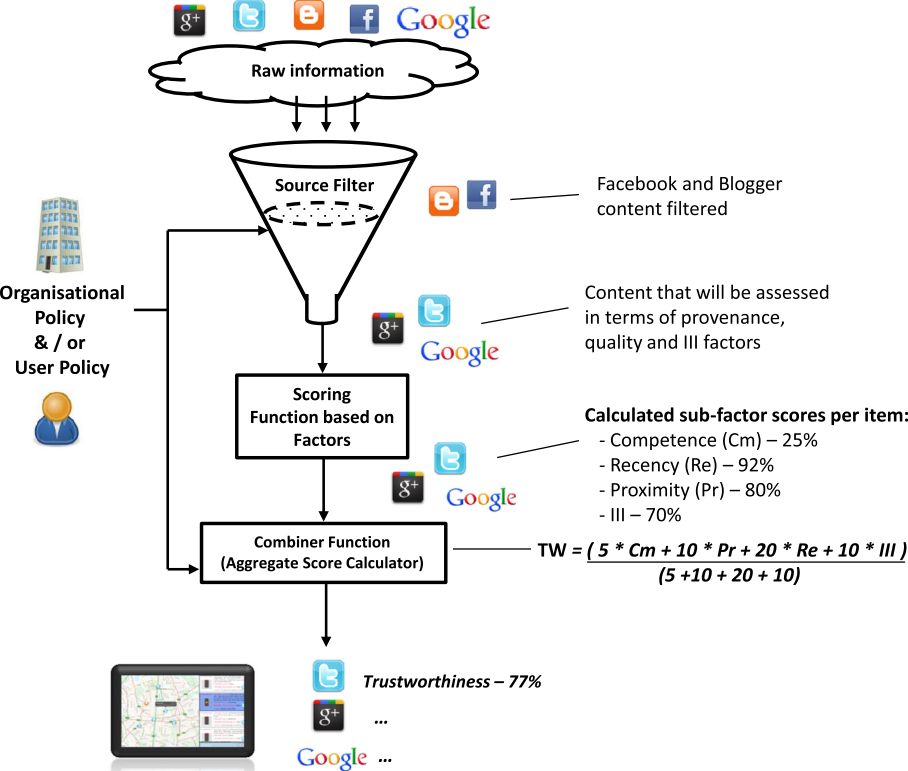

Supplement: MOESM1 [file 11899612]
